# Supplementary material for: Low Bone Mineral Density and Risk for Osteoporotic Fractures in Patients with Chronic Pancreatitis
Source: Nutrients. 2021 Jul 13;13(7):2386. doi: 10.3390/nu13072386 (PMC8308495; doi:10.3390/nu13072386)
Supplement: Supplementary file 1 [file nutrients-13-02386-s001.zip › nutrients-1291401-supplementary.pdf]

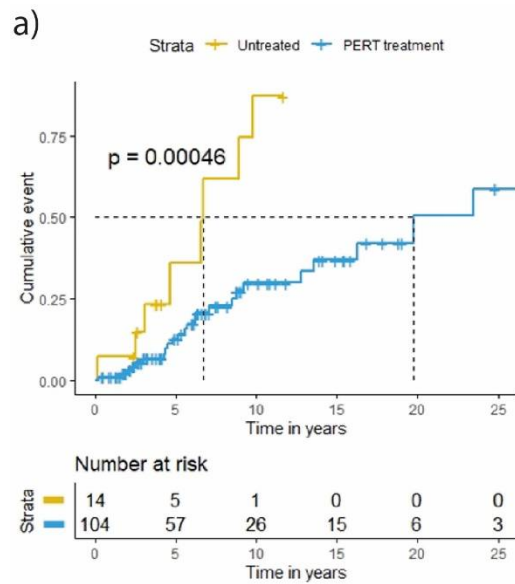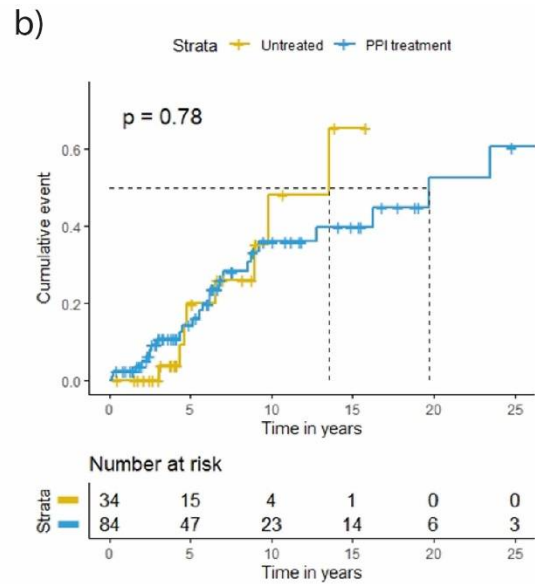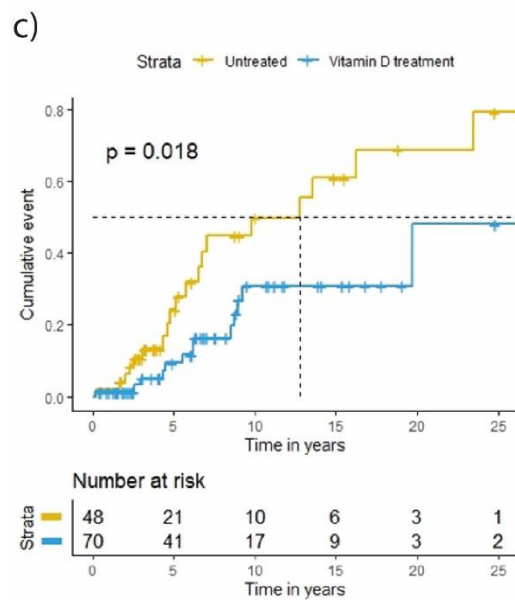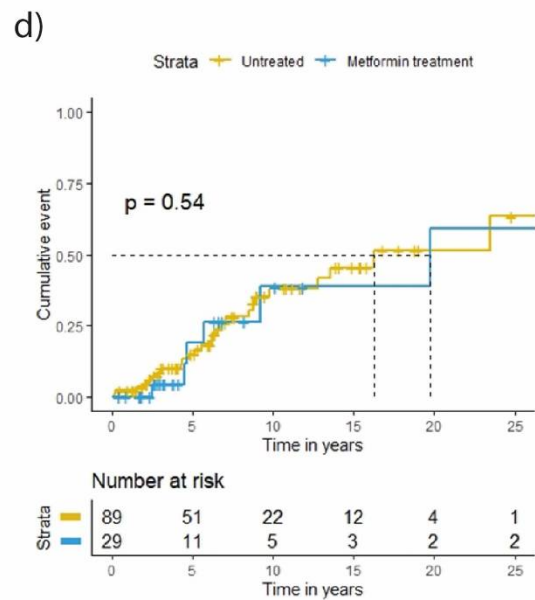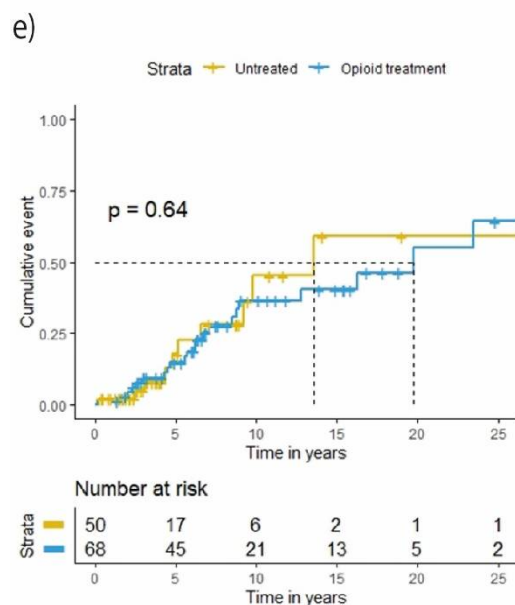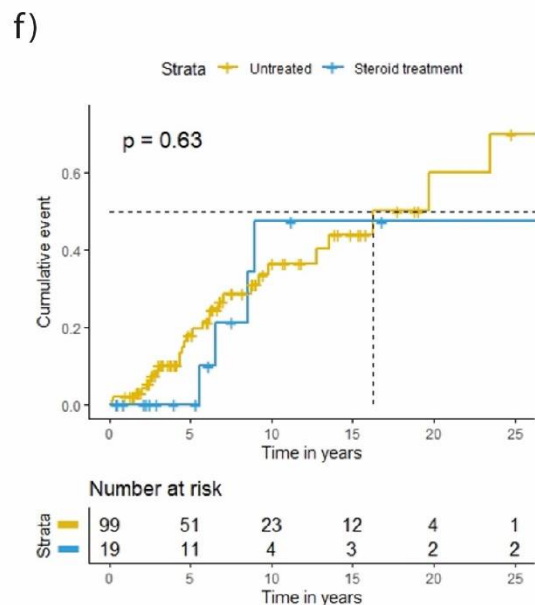

**Figure S1.** Kaplan-Maier curves of cumulative fracture events for all patients stratified by **a)** PERT supplementation, **b)** PPI treatment, **c)** Vitamin D supplementation, **d)** Metformin treatment, **e)** Opioid treatment and **f)** Steroid treatment. Treatment or supplementation was defined as 90 or more consecutive days of regular treatment at any time before the fracture event (PERT=pancreatic enzyme replacement therapy; PPI=proton pump inhibitor).

**Table S1. Cox regression analysis adjusted hazard ratio (aHR) of fracture events in patients treated with PERT, PPI, Vitamin D, Metformin, Opioids or Steroids during 90 or more consecutive daily regular treatments at any time before the fracture event.**

| <b>Treatment</b> | <b>aHR* [95% CI]</b> |
|------------------|----------------------|
| PERT             | 0.3 [0.1,0.7]        |
| PPI              | 1.2 [0.5,2.7]        |
| Vitamin D        | 0.4 [0.2,0.8]        |
| Metformin        | 0.8 [0.3,2.2]        |
| Opioids          | 1.2 [0.6,2.6]        |
| Steroid          | 0.6 [0.2,1.5]        |

aHR was adjusted for sex, age and BMI.
